# Supplementary material for: A systematic review of the incidence and prevalence of sleep disorders and seizure disorders in multiple sclerosis
Source: PubMed Central journal article supplement — Mult Scler. 2015 Mar;21(3):342–9. doi: 10.1177/1352458514564486 (PMC4429167; doi:10.1177/1352458514564486), 2015-03
Supplement: Supplemental_Table_2.pdf [file Supplemental_Table_2.pdf]

**Supplemental Table 2. Studies reporting the prevalence of seizure disorders (epilepsy) in multiple sclerosis**

| Study (Year)                    | Region/ Sub-Region                | Source/ Population                                                                  | Prevalence Day/Period | Diagnostic Criteria: MS/ Established By | Diagnostic Criteria: Epilepsy/ Established By | Crude Overall Prevalence (95%CI)                                                                                               | Age-Standardized Overall Prevalence (95%CI) | Crude Prevalence (95%CI) |                | Standardized Prevalence (95%CI) |         | Quality Score |
|---------------------------------|-----------------------------------|-------------------------------------------------------------------------------------|-----------------------|-----------------------------------------|-----------------------------------------------|--------------------------------------------------------------------------------------------------------------------------------|---------------------------------------------|--------------------------|----------------|---------------------------------|---------|---------------|
|                                 |                                   |                                                                                     |                       |                                         |                                               |                                                                                                                                |                                             | Males                    | Females        | Males                           | Females |               |
| Brichetto <sup>14</sup> (2003)  | Italy/ Genoa                      | All persons with MS in Genoa                                                        | Feb1998-Jun 2000      | Poser                                   | Self-report/Medication use                    | Seizures 8/665 = 1.20%                                                                                                         | NR                                          | NR                       | NR             | NR                              | NR      | 6/9           |
| Catenoix <sup>15</sup> (2011)   | France/ Lyon City and Rhone-Alpes | EDMUS Lyon MS Cohort, Lyon Neurology Clinic/ all MS patients examined at least once | 1976-2007             | Neurologist diagnosed: Poser            | EDMUS database/recorded as a symptom of MS    | At least 1 epileptic seizure 102/5,041 = 2.02%<br><br>At least 1 epileptic seizure due to cause other than MS 67/5,041 = 1.33% | NR                                          | NR                       | NR             | NR                              | NR      | 5/8           |
| Cendrowski <sup>16</sup> (1972) | Poland                            | Neurology clinic                                                                    | NR                    | Clinical observation: Dissemination of  | Clinical observation                          | Epilepsy 17/500 = 3.4%                                                                                                         | NR                                          | 4/200 = 2.00%            | 13/300 = 4.33% | NR                              | NR      | 1/9           |

|                                |         |                                                                    |                          |                                                                                    |                                                           |                                                                                                                                                                      |    |           |              |    |    |     |
|--------------------------------|---------|--------------------------------------------------------------------|--------------------------|------------------------------------------------------------------------------------|-----------------------------------------------------------|----------------------------------------------------------------------------------------------------------------------------------------------------------------------|----|-----------|--------------|----|----|-----|
|                                |         |                                                                    |                          | foci in space and remittent course of the disease.                                 |                                                           |                                                                                                                                                                      |    |           |              |    |    |     |
| Cheng <sup>17</sup><br>(2012)  | Taiwan  | Chang Gung Memorial Hospital/ identified from medical records      | Jan 1,1989- Dec 31, 2008 | Neurologist diagnosed: Poser or McDonald 2001                                      | Medical Record Review/ ILAE 1981 classification, EEG, MRI | Epileptic seizures<br>8/93 = 8.06%<br>MS-related seizures (at time of relapse)<br>4/93 = 4.30%<br><br>Recurrent seizures (not related to MS relapse)<br>4/93 = 4.30% | NR | 0/23 = 0% | 8/70 = 11.4% | NR | NR | 5/8 |
| Durmus <sup>19</sup><br>(2013) | Turkey  | MS, Demyelinating Disorders and Child Neurology Units/ Definite MS | 1998-2008                | Neurologist diagnosed: McDonald 2001<br><br>Pediatric MS ≤16 years of age at onset | Medical Record Review/ ILAE 1981 classification, EEG      | Epilepsy<br>36/2,300 = 1.57%<br><br>Epilepsy in pediatric MS<br>8/146 = 5.48%                                                                                        | NR | NR        | NR           | NR | NR | 5/8 |
| Engelsen <sup>20</sup>         | Norway/ | Department                                                         | 1958-1988                | Neurologist                                                                        | Medical Record                                            | Epilepsy                                                                                                                                                             | NR | 6/169 =   | 11/254 =     | NR | NR | 7/8 |

|                                    |                       |                                                                    |                   |                                      |                                                        |                                                            |    |                               |                               |    |    |     |
|------------------------------------|-----------------------|--------------------------------------------------------------------|-------------------|--------------------------------------|--------------------------------------------------------|------------------------------------------------------------|----|-------------------------------|-------------------------------|----|----|-----|
| (1997)                             | Hordaland County      | of Neurology                                                       |                   | diagnosed: McAlpine                  | Review/ILAE 1981 classification                        | 16/423 = 3.78%                                             |    | 3.55%                         | 4.33%                         |    |    |     |
| Eriksson <sup>21</sup><br>(2002)   | Sweden/<br>Gothenburg | MS incidence cohort, clinically definite or probable MS            | 1950-1989         | Neurologist diagnosed: Poser         | Patient chart review and EEG when available            | Epilepsy 19/254 = 3.50%                                    | NR | NR                            | NR                            | NR | NR | 7/8 |
| Etemadifar <sup>23</sup><br>(2012) | Iran/<br>Isfahan      | Isfahan MS Society/<br>Pediatric onset MS (symptoms ≤16 years old) | Apr 2003-Jul 2010 | Neurologist diagnosed: McDonald 2005 | Clinical record review/ILAE criteria, EEG and MRI      | Pediatric MS:<br>Epilepsy before MS onset<br>2/117 = 1.71% | NR | Epilepsy EOMS<br>1/19 = 5.26% | Epilepsy EOMS<br>9/98 = 9.81% | NR | NR | 7/8 |
| Etemadifar <sup>22</sup><br>(2013) |                       | Adult onset MS                                                     |                   |                                      |                                                        | Epilepsy 10/117 = 8.55%                                    |    | Epilepsy 15/806 = 1.86%       | Epilepsy 66/2,716 = 2.43%     |    |    |     |
| Gambardella <sup>24</sup> (2003)   | Italy/<br>Catanzaro   | Institute of Neurology School of Medicine/co                       | NR                | Neurologist diagnosed: Poser         | Clinical record review/ILAE 1981 criteria, EEG and MRI | Temporal Lobe Epilepsy 5/350 = 1.43%                       | NR | NR                            | NR                            | NR | NR | 6/8 |

|                                |                                               |                                                 |                              |                                                      |                                                                                                               |                                                                                                                                             |    |    |    |    |    |     |
|--------------------------------|-----------------------------------------------|-------------------------------------------------|------------------------------|------------------------------------------------------|---------------------------------------------------------------------------------------------------------------|---------------------------------------------------------------------------------------------------------------------------------------------|----|----|----|----|----|-----|
|                                |                                               | nsecutive patients with definite or probable MS |                              |                                                      |                                                                                                               | Epilepsy lifetime prevalence<br>16/350 = 4.57%                                                                                              |    |    |    |    |    |     |
| Ghezzi <sup>25</sup><br>(1990) | Italy/<br>Milano                              | MS centre/<br>all patients with MS onset ≥ 1    | Jan 1, 1982-<br>Jun 30, 1988 | Neurologist diagnosed:<br>McAlpine                   | ILAE 1981 criteria, EEG, cranial CT scan and MRI in some cases                                                | Epilepsy<br>40/2,353 = 1.70%<br><br>Definite MS<br>34/1,459 = 2.33%<br><br>Probable MS<br>3/518 = 0.58%<br><br>Possible MS<br>3/376 = 0.80% | NR | NR | NR | NR | NR | 6/8 |
| Horton <sup>26</sup><br>(2010) | Canada/<br>Manitoba<br>United States/<br>Ohio | Participants recruited from 2 MS clinics        | Oct 2008-Oct 2009            | McDonald 2005; diagnosed by neurologist at MS clinic | The Self-Administered Comorbidity Questionnaire (validated questionnaire). Validated by medical records data. | Epilepsy<br>8/404 = 1.98%<br>by<br>questionnaire<br>7/404 = 1.73%<br>by medical records                                                     | NR | NR | NR | NR | NR | 5/8 |

|                                  |                                   |                                                                 |             |                                                                                                                    |                                                                       |                                                                          |                       |      |      |       |       |     |
|----------------------------------|-----------------------------------|-----------------------------------------------------------------|-------------|--------------------------------------------------------------------------------------------------------------------|-----------------------------------------------------------------------|--------------------------------------------------------------------------|-----------------------|------|------|-------|-------|-----|
| Kang <sup>27</sup><br>(2010)     | Taiwan                            | NHIRD population, age $\geq 15$ years                           | 2007        | ICD-9-CM code 340, at least two consensus MS diagnoses under the care of certified neurologists during 2007        | ICD-9-CM 345.0-345.9, one hospital or two ambulatory physician claims | Epilepsy 57/898 = 6.35%                                                  | NR                    | NR   | NR   | NR    | NR    | 4/8 |
| Kinnunen <sup>28</sup><br>(1986) | Finland/<br>Uusimaa               | All MS patients in the province of Uusimaa, clinically definite | Jan 1, 1979 | Neurologist diagnosed: Schumacher                                                                                  | ILAE criteria, EEG and CSF                                            | Epilepsy lifetime prevalence 21/599 = 3.51%<br><br>Point prevalence 2.0% | Point prevalence 5.0% | 3.3% | 3.6% | NR    | NR    | 8/8 |
| Krokki <sup>7</sup><br>(2006)    | Finland/<br>Northern Ostrobothnia | Outpatient Department of Neurology at OUH, all new cases        | 1990-2010   | ICD-9 3400A (1990-1995)<br>ICD-10 G35 (1996-2010)<br>Neurologist established (Poser, McDonald 2001, McDonald 2005) | Medical records review                                                | Epilepsy 23/491 = 4.7%                                                   | NR                    | NR   | NR   | NR    | NR    | 6/8 |
| Marrie <sup>29</sup>             | Canada/                           | Administrati                                                    | 1984-2005   | Administrative                                                                                                     | Epilepsy: $\geq 1$                                                    | NR                                                                       | Epilepsy              | NR   | NR   | 3.76% | 4.88% | 8/8 |

|                                |                  |                                                                                      |                             |                                                                                                                                                                                                                                                                                                                      |                                                                                         |                                            |                      |                  |                   |             |             |     |
|--------------------------------|------------------|--------------------------------------------------------------------------------------|-----------------------------|----------------------------------------------------------------------------------------------------------------------------------------------------------------------------------------------------------------------------------------------------------------------------------------------------------------------|-----------------------------------------------------------------------------------------|--------------------------------------------|----------------------|------------------|-------------------|-------------|-------------|-----|
| (2013)                         | Manitoba         | ve data/<br>Entire<br>population<br>of Manitoba                                      |                             | case definition,<br>validated against<br>medical<br>records/ICD-9-<br>CM 340 and<br>ICD-10-CA<br>G35/ 1984–2007<br>all<br>cases with $\geq 3$<br>prescription,<br>hospital or<br>physician claims<br>for MS.<br>After 2004 all<br>cases with $\geq 1$<br>hospital,<br>physician or<br>prescription<br>claims for MS. | hospital or<br>physician claims<br>and $\geq 2$ prescription<br>claims over 3<br>years. |                                            | 4.12%<br>(3.42–4.82) |                  |                   | (2.73–5.20) | (4.10–5.81) |     |
| Moreau <sup>31</sup><br>(1998) | France/<br>Dijon | Neurology<br>Service<br>University<br>Hospital of<br>Dijon/conve<br>nience<br>sample | Jan 1, 1986-<br>Mar 7, 1997 | Neurologist<br>diagnosed: Poser                                                                                                                                                                                                                                                                                      | ILAE 1993<br>criteria, EEG                                                              | Epileptic<br>seizures<br>17/402 =<br>4.23% | NR                   | 7/162 =<br>4.32% | 10/240 =<br>4.17% | NR          | NR          | 4/9 |
| Nicoletti <sup>5</sup>         | Italy/           | MS Centers,                                                                          | Jan 1, 1995                 | Neurologist                                                                                                                                                                                                                                                                                                          | ILAE 1993                                                                               | Epilepsy                                   | Epilepsy             | NR               | NR                | NR          | NR          | 8/8 |

|                                  |                                           |                                                                                                                                          |                             |                                 |                                                            |                                                            |           |    |    |    |    |    |     |
|----------------------------------|-------------------------------------------|------------------------------------------------------------------------------------------------------------------------------------------|-----------------------------|---------------------------------|------------------------------------------------------------|------------------------------------------------------------|-----------|----|----|----|----|----|-----|
| (2003)                           | Catania                                   | IMSA, private neurologists and family physicians/ patients identified from epidemiological study determining MS prevalence and incidence |                             | diagnosed: Poser                | criteria, and treated with antiepileptic drugs             | 1.54% (0.39-4.12)                                          | 7.7/1,000 |    |    |    |    |    |     |
| Nuyen <sup>32</sup><br>(2006)    | Netherlands                               | DNSGP                                                                                                                                    | 2001                        | ICPC code N86                   | Consultation with GP during (1-year period).<br>ICPC N88   | Epilepsy<br>3/241 = 1.24%                                  | NR        | NR | NR | NR | NR | NR | 5/8 |
| Nyquist <sup>34</sup><br>(2001)  | United States/ Minnesota (Olmsted County) | Mayo Clinic                                                                                                                              | Jan 1, 1990-<br>Jan 1, 1998 | Neurologist<br>diagnosed: Poser | Medical Record Review/<br>ILAE classification, EEG and MRI | Epileptic seizures lifetime prevalence<br>51/5,715 = 0.89% | NR        | NR | NR | NR | NR | NR | 7/8 |
| Olafsson <sup>35</sup><br>(1999) | Iceland                                   | Neurology clinic/medic                                                                                                                   | 1965-1989                   | Neurologist<br>diagnosed: Poser | Medical Record Review/                                     | Epilepsy<br>Lifetime                                       | NR        | NR | NR | NR | NR | NR | 7/8 |

|                                      |                   |                                                                                        |                   |                                         |                                                                                                                                                                           |                                                                                                                |    |                                                |                                                  |    |    |     |
|--------------------------------------|-------------------|----------------------------------------------------------------------------------------|-------------------|-----------------------------------------|---------------------------------------------------------------------------------------------------------------------------------------------------------------------------|----------------------------------------------------------------------------------------------------------------|----|------------------------------------------------|--------------------------------------------------|----|----|-----|
|                                      |                   | al records                                                                             |                   |                                         | ILAE classification                                                                                                                                                       | prevalence<br>5/188 = 2.66%                                                                                    |    |                                                |                                                  |    |    |     |
| Shaygannejad <sup>36</sup><br>(2013) | Iran/<br>Isfahan  | MS clinic of the Kashani hospital/ all patients with definite MS diagnosis             | Mar 2007-Jun 2011 | Neurologist diagnosed:<br>McDonald 2005 | Medical Record Review/<br>ILAE classification, EEG, MRI and antiepileptic drug use                                                                                        | Seizures with underlying etiologies other than MS<br>29/920 = 3.15%                                            | NR | NR                                             | NR                                               | NR | NR | 6/8 |
| Sokic <sup>38</sup><br>(2001)        | Serbia            | Institute of Neurology, Belgrade School of Medicine/ consecutive hospitalized patients | 1996-1997         | Neurologist diagnosed: Poser            | Medical Record Review/<br>ILAE 1981 classification, EEG and MRI<br><br>Chronic Epilepsy/<br>Spontaneously repeating seizures occurring regardless of clinical phase of MS | Chronic Epilepsy<br>12/268 = 4.48%<br><br>Epileptic seizures or epilepsy lifetime prevalence<br>20/268 = 7.46% | NR | Epileptic seizures or epilepsy<br>6/83 = 7.23% | Epileptic seizures or epilepsy<br>14/165 = 8.48% | NR | NR | 6/8 |
| Trouillas <sup>40</sup><br>(1971)    | France/<br>Lyon   | Neurological Hospital                                                                  | NR                | NR                                      | Clinical records, EEG                                                                                                                                                     | Epilepsy<br>10/132 = 7.58%                                                                                     | NR | NR                                             | NR                                               | NR | NR | 0/9 |
| Viveiros <sup>42</sup><br>(2010)     | Brazil/<br>Rio de | SIAPEM database/all                                                                    | 1997-2007         | Neurologist diagnosed:                  | Medical Record Review/                                                                                                                                                    | Epileptic seizures                                                                                             | NR | Epileptic seizures                             | Epileptic seizures                               | NR | NR | 4/8 |



|  |         |                                                    |  |                        |                                       |                                      |  |                                    |                                      |  |  |  |
|--|---------|----------------------------------------------------|--|------------------------|---------------------------------------|--------------------------------------|--|------------------------------------|--------------------------------------|--|--|--|
|  | Janeiro | patients followed up at a private neurology clinic |  | McDonald 2001 and 2005 | ILAE 1989 classification, EEG and MRI | lifetime prevalence<br>5/160 = 3.13% |  | lifetime prevalence<br>1/40 = 2.5% | lifetime prevalence<br>4/120 = 3.33% |  |  |  |
|--|---------|----------------------------------------------------|--|------------------------|---------------------------------------|--------------------------------------|--|------------------------------------|--------------------------------------|--|--|--|

NR: Not Reported, OUH: Oulu University Hospital, DNSGP: Dutch National Survey of General Practice, EDMUS: European Database for Multiple Sclerosis, ILAE: International League against Epilepsy, IMSS: Isfahan Multiple Sclerosis Society, EOMS: Early Onset Multiple Sclerosis, IMSA: Italian Multiple Sclerosis Association, SIAPEM: Brazilian Software Database for Multiple Sclerosis Research in Tropical Countries, NHIRD: National Health Insurance Research Database.
