# Supplementary material for: A systematic review of the incidence and prevalence of sleep disorders and seizure disorders in multiple sclerosis
Source: PubMed Central journal article supplement — Mult Scler. 2015 Mar;21(3):342–9. doi: 10.1177/1352458514564486 (PMC4429167; doi:10.1177/1352458514564486), 2015-03
Supplement: Supplemental_Table_3.pdf [file Supplemental_Table_3.pdf]

**Supplemental Table 3. The incidence and prevalence of epilepsy in the multiple sclerosis population as compared to controls**

| Study (year)                  | MS, n                      | Controls, n (matched)                                                                | Source of controls                                                                                | Epilepsy in MS                                                                                      | Epilepsy in controls                                          | Comparison                                                 |
|-------------------------------|----------------------------|--------------------------------------------------------------------------------------|---------------------------------------------------------------------------------------------------|-----------------------------------------------------------------------------------------------------|---------------------------------------------------------------|------------------------------------------------------------|
| <i>Prevalence</i>             |                            |                                                                                      |                                                                                                   |                                                                                                     |                                                               |                                                            |
| Kang <sup>27</sup> (2010)     | 898                        | 4490 (yes: sex, age, monthly income level of urbanization in community)              | Randomly selected patients from the NHIRD                                                         | Epilepsy<br>57/898 = 6.35%                                                                          | Epilepsy<br>19/4,490= 0.42%                                   | OR<br>16.0 (9.5-27.1)                                      |
| Marrie <sup>29</sup> (2013)   | 4,192                      | 20,940 (yes: sex, year of birth and region of residence)                             | General population of Manitoba                                                                    | Epilepsy<br>4.12% (3.42–4.82)                                                                       | Epilepsy<br>1.12% (0.96-1.29)                                 | 3-fold higher than<br>General Population                   |
| Nicoletti <sup>5</sup> (2003) | 175                        | NR                                                                                   | Incidence risk of General Population of Sicily                                                    | Epilepsy<br>Age-adjusted prevalence<br>7.7/1,000                                                    | Epilepsy<br>Age-adjusted prevalence<br>3.7/1,000              | NR                                                         |
| <i>Incidence</i>              |                            |                                                                                      |                                                                                                   |                                                                                                     |                                                               |                                                            |
| Allen <sup>13</sup> (2013)    | ORLS: 3,913<br>HES: 85,772 | NR (yes: age, sex, calendar year of first recorded admission, socio-economic status) | ORLS, HES/Constructed from people with first admissions for minor medical and surgical conditions | ORLS<br>62/3,913 = 1.58%<br><br>HES<br>2,580/85,772 = 3.01%                                         | ORLS<br>15.3/3,913 = 0.39%<br><br>HES<br>809.7/85,772 = 0.94% | RR<br>4.1 (3.14–5.27)<br><br>3.3 (3.14–3.40)               |
| Nicoletti <sup>5</sup> (2003) | 170                        | NR                                                                                   | Incidence risk of General Population of Copparo in 1983                                           | Epilepsy<br>Age-adjusted incidence<br>147.8/100,000                                                 | Epilepsy<br>Age-adjusted incidence<br>44.7/100,000            | RR<br>3.29 (2.36-4.59)                                     |
| Nyquist <sup>33</sup> (2002)  | 208                        | NR                                                                                   | General population of Rochester from 1935-1984.<br>Obtained from previous study.                  | Epileptic seizures after definite MS diagnosis<br>Age-adjusted incidence<br>61/100,000 person years | Epilepsy<br>Age-adjusted incidence<br>61/100,000 person years | Epileptic seizures after definite MS diagnosis<br>P = 0.88 |

|                                  |     |                                             |                               |                                                                                                                        |    |                                                                                                           |
|----------------------------------|-----|---------------------------------------------|-------------------------------|------------------------------------------------------------------------------------------------------------------------|----|-----------------------------------------------------------------------------------------------------------|
|                                  |     |                                             |                               | (7-114)<br>Epileptic seizures after first MS symptoms<br>Age-adjusted incidence<br>80/100,000 person years<br>(24-135) |    | Epileptic seizures after first MS symptoms<br>P=0.70                                                      |
| Olafsson <sup>35</sup><br>(1999) | 188 | Estimated age-specific incidence in Iceland | General population of Iceland | Epilepsy<br>After MS onset<br>4/188 = 2.13%<br><br>Epilepsy<br>After MS diagnosis<br>3/188 = 1.60%                     | NR | SIR<br>Epilepsy<br>After MS onset<br>2.9 (0.8-7.4)<br><br>Epilepsy<br>After MS diagnosis<br>3.0 (0.6-8.8) |

NR: Not Reported, OR: Odds Ratio, RR: Relative Risk, SIR: Standardized Incidence Ratio, HES: English National Hospital Episode Statistics, ORLS: Oxford Record Linkage Study,

NHIRD: National Health Insurance Research Database.
