# Supplementary material for: A systematic review of the incidence and prevalence of sleep disorders and seizure disorders in multiple sclerosis
Source: PubMed Central journal article supplement — Mult Scler. 2015 Mar;21(3):342–9. doi: 10.1177/1352458514564486 (PMC4429167; doi:10.1177/1352458514564486), 2015-03
Supplement: Supplemental_Table_4.pdf [file Supplemental_Table_4.pdf]

**Supplemental Table 4. Studies reporting the prevalence of sleep disorders in multiple sclerosis**

| Study (Year)                | Region/ Sub-Region      | Source/ Population                                                              | Prevalence Day/ Period | Diagnostic Criteria: MS/ Established By | Diagnostic Criteria: sleep disorders/ Established By                                                                                                                         | Crude Overall Prevalence (95%CI)                                            | Age-Standardized Overall Prevalence (95%CI) | Crude Prevalence (95%CI) |                | Standardized Prevalence (95%CI) |         | Quality Score |
|-----------------------------|-------------------------|---------------------------------------------------------------------------------|------------------------|-----------------------------------------|------------------------------------------------------------------------------------------------------------------------------------------------------------------------------|-----------------------------------------------------------------------------|---------------------------------------------|--------------------------|----------------|---------------------------------|---------|---------------|
|                             |                         |                                                                                 |                        |                                         |                                                                                                                                                                              |                                                                             |                                             | Males                    | Females        | Males                           | Females |               |
| Auger <sup>60</sup> (2005)  | Canada/ Quebec          | MS outpatient clinic, French-Canadians                                          | NR                     | Neurologist diagnosed: Criteria NR      | Questionnaire: IRLSSG criteria                                                                                                                                               | RLS<br>75/200 = 37.5%                                                       | NR                                          | NR                       | NR             | NR                              | NR      | 3/9           |
| Braley <sup>43</sup> (2012) | United States/ Michigan | University of Michigan MS clinic database patients referred for polysomnography | March 1999-June 2010   | Neurologist diagnosed: Criteria NR      | OSA/<br>Polysomnography<br>AHI of $\geq 5$ episodes per hour of sleep<br><br>CSA<br>central apnea index of $\geq 5$ episodes per hour of sleep, in the absence of severe OSA | OSA<br>27/48 = 56.3%<br><br>CSA<br>2/48 = 4.17%<br><br>Both<br>3/48 = 6.25% | NR                                          | NR                       | NR             | NR                              | NR      | 5/9           |
| Deriu <sup>44</sup> (2009)  | Italy/ Cagliari         | MS Outpatient clinic, General                                                   | January 2007-          | Neurologist diagnosed:                  | Questionnaire: IRLSSG criteria                                                                                                                                               | RLS<br>29/202 = 14.4%                                                       | NR                                          | 7/67 = 10.4%             | 22/135 = 16.3% | NR                              | NR      | 5/9           |

|                              |                           |                                                                                                                                                                |                                      |                                      |                                                                        |                                                                                             |    |                                            |                                            |    |    |     |
|------------------------------|---------------------------|----------------------------------------------------------------------------------------------------------------------------------------------------------------|--------------------------------------|--------------------------------------|------------------------------------------------------------------------|---------------------------------------------------------------------------------------------|----|--------------------------------------------|--------------------------------------------|----|----|-----|
|                              |                           | Hospital S. Michele/consecutive patients without iron deficiency, renal failure, other neurological diseases, pregnancy, recent relapse or recent MS diagnosis | December 2007                        | McDonald 2001                        |                                                                        |                                                                                             |    |                                            |                                            |    |    |     |
| Dias <sup>45</sup> (2012)    | United States/ California | University of California Davis Neurology MS Clinic/ consecutive patients aged ≥18 years old                                                                    | September 28, 2010- January 25, 2011 | Self-report                          | STOP-BANG questionnaires, ESS                                          | STOP high risk for OSA<br>43/103 = 41.7%<br><br>Previously diagnosed with OSA 2/103 = 1.94% | NR | STOP BANG high risk for OSA<br>22/29 = 76% | STOP BANG high risk for OSA<br>21/74 = 28% | NR | NR | 2/9 |
| Fragoso <sup>47</sup> (2011) | Brazil                    | MS outpatient clinics across 4 different Brazilian cities aged 18-70 years                                                                                     | November 2009- December 2009         | Neurologist diagnosed: McDonald 2001 | Interviews/ IRLSSG criteria<br><br>Restless Legs Syndrome Rating Scale | RLS<br>46/80 = 57.5%<br><br>Mild RLS<br>7/80 = 8.75%                                        | NR | NR                                         | NR                                         | NR | NR | 5/9 |

|                                        |                     |                                                                                                                                                                                                                                                                                          |    |                                 |                                                                                                                                                                                                |                                                        |    |               |                |    |    |     |
|----------------------------------------|---------------------|------------------------------------------------------------------------------------------------------------------------------------------------------------------------------------------------------------------------------------------------------------------------------------------|----|---------------------------------|------------------------------------------------------------------------------------------------------------------------------------------------------------------------------------------------|--------------------------------------------------------|----|---------------|----------------|----|----|-----|
|                                        |                     |                                                                                                                                                                                                                                                                                          |    |                                 |                                                                                                                                                                                                | Moderate<br>23/80 = 28.8%                              |    |               |                |    |    |     |
|                                        |                     |                                                                                                                                                                                                                                                                                          |    |                                 |                                                                                                                                                                                                | Severe<br>9/80 = 11.3%                                 |    |               |                |    |    |     |
| Ferini-Strambi <sup>46</sup><br>(1994) | Italy/<br>Milan     | MS Center of the Scientific Institute H San Raffaele/ EDSS <6.0, duration of disease longer than 2 years, aged 25-55 years, no concurrent medical diseases, no psychiatric disorders before MS diagnosis, no history of alcohol or drug abuse, no medications for 2 weeks before testing |    | Neurologist<br>diagnosed: Poser | Polysomnography/<br>PLM:<br>anterior tibia muscle EMG activity lasting 0.5-5sec in association with ≥5 consecutive movements having an interval between 4-90 sec.<br>Sleep Apnea:<br>AHI of ≥5 | PLM<br>9/25 = 36.0%<br><br>Sleep Apnea<br>3/25 = 12.0% | NR | NR            | NR             | NR | NR | 4/9 |
| Gomez-Choco <sup>48</sup>              | Spain/<br>Barcelona | MS outpatient clinic/                                                                                                                                                                                                                                                                    | NR | Neurologist<br>diagnosed: Poser | Semi-structured interviews.                                                                                                                                                                    | RLS<br>18/135 = 13.3%                                  | NR | RLS<br>6/53 = | RLS<br>12/82 = | NR | NR | 5/9 |

|                                      |                     |                                                                                                                                                                                                                                                                                  |                                |                                            |                                                                                                                                                                                                     |                                                                                                                       |    |       |       |    |    |     |
|--------------------------------------|---------------------|----------------------------------------------------------------------------------------------------------------------------------------------------------------------------------------------------------------------------------------------------------------------------------|--------------------------------|--------------------------------------------|-----------------------------------------------------------------------------------------------------------------------------------------------------------------------------------------------------|-----------------------------------------------------------------------------------------------------------------------|----|-------|-------|----|----|-----|
| (2007)                               |                     | consecutive patients                                                                                                                                                                                                                                                             |                                |                                            | RLS/<br>IRLSSG criteria<br><br>RBD/<br>International<br>Classification of<br>Sleep Disorders-2<br>criteria and<br>confirmed by<br>video                                                             | RBD<br>3/135 = 2.22%                                                                                                  |    | 11.3% | 14.6% |    |    |     |
| Kaminsk<br>a <sup>49</sup><br>(2012) | Canada/<br>Montreal | MS outpatient<br>clinic Montreal<br>Neurological<br>Hospital, EDSS<br>0-7.0, no<br>relapses for 30<br>days before<br>screening, no<br>chronic steroids<br>for ≥6 months,<br>excluding<br>pregnancy,<br>cognitive or<br>psychiatric<br>conditions<br>precluding<br>consent, other | July 2007-<br>February<br>2010 | Neurologist<br>diagnosed:<br>McDonald 2001 | Questionnaire:<br>Pittsburgh Sleep<br>Quality Index,<br>RLS questionnaire<br>using IRLSSG<br>criteria, narcolepsy<br>questionnaire,<br>RBD<br>questionnaire, FSS<br><br>Polysomnography<br><br>MSLT | OSA (AHI ≥15)<br>36/62 = 58.1%<br><br>RLS<br>17/62 = 27.4%<br><br>RBD<br>2/62 = 3.2%<br><br>Narcolepsy<br>1/62 = 1.6% | NR | NR    | NR    | NR | NR | 4/9 |

|                              |                 |                                                                                                                                                           |                |                                          |                                                                                                       |                                                           |    |    |                                                           |    |    |     |
|------------------------------|-----------------|-----------------------------------------------------------------------------------------------------------------------------------------------------------|----------------|------------------------------------------|-------------------------------------------------------------------------------------------------------|-----------------------------------------------------------|----|----|-----------------------------------------------------------|----|----|-----|
|                              |                 | significant neurological, pulmonary, otorhinological, medical disorders, depression in last year, use of medications for RLS, treatment for OSA, FVC <60% |                |                                          |                                                                                                       |                                                           |    |    |                                                           |    |    |     |
| Li <sup>50</sup> (2012)      | United States   | Nurses' Health Study (NHS) II/ all women                                                                                                                  | 1989-June 2005 | Self-report confirmed by medical records | Questionnaire: IRLSSG criteria and $\geq 5$ restless legs/month, Severe $\geq 15$ restless legs/month | RLS<br>41/264 = 15.5%<br><br>Severe RLS<br>26/264 = 9.85% | NR | NR | RLS<br>41/264 = 15.5%<br><br>Severe RLS<br>26/264 = 9.85% | NR | NR | 6/9 |
| Manconi <sup>51</sup> (2007) | Italy/<br>Milan | Neuroimaging Research Unit of San Raffaele Institute and Department of Neurology, University of Pisa/consecutiv                                           | NR             | Neurologist diagnosed: McDonald 2001     | Interview: IRLSSG criteria frequency 1/week in the past 6 months                                      | RLS<br>51/156 = 32.7%                                     | NR | NR | NR                                                        | NR | NR | 5/9 |

|                              |                 |                                                                                                                                                                                                                                       |    |                                      |                                                                  |                      |    |    |    |    |    |     |
|------------------------------|-----------------|---------------------------------------------------------------------------------------------------------------------------------------------------------------------------------------------------------------------------------------|----|--------------------------------------|------------------------------------------------------------------|----------------------|----|----|----|----|----|-----|
|                              |                 | e MS patients excluding those taking dopaminergic or antidopaminergic drugs, diseases known to be induced by or related to RLS, other neurological diseases, MS diagnosis within 6 months, history of alcohol or drug abuse, MMSE <24 |    |                                      |                                                                  |                      |    |    |    |    |    |     |
| Manconi <sup>52</sup> (2008) | Italy/<br>Milan | Neuroimaging Research Unit of San Raffaele Institute/consecutive MS patients excluding those treated with                                                                                                                             | NR | Neurologist diagnosed: McDonald 2005 | Interview: IRLSSG criteria frequency 1/week in the past 6 months | RLS<br>30/82 = 36.6% | NR | NR | NR | NR | NR | 6/9 |

|                              |       |                                                                                                                                                                                           |                            |                                      |                                                                  |                                 |    |    |    |    |    |     |
|------------------------------|-------|-------------------------------------------------------------------------------------------------------------------------------------------------------------------------------------------|----------------------------|--------------------------------------|------------------------------------------------------------------|---------------------------------|----|----|----|----|----|-----|
|                              |       | dopaminergic, anti-dopaminergic, opioids, anti-epileptic central or peripheral myorelaxant drugs, no alcohol or drug abuse, no relapse or steroids within 6 months                        |                            |                                      |                                                                  |                                 |    |    |    |    |    |     |
| Manconi <sup>53</sup> (2008) | Italy | 20 sleep centers across Italy, 18-65 years<br>Exclusion criteria: neurologic disorders (other than MS for the patient group); specific diseases known to be induced by or related to RLS; | February 2006-October 2006 | Neurologist diagnosed: McDonald 2001 | Interview: IRLSSG criteria frequency 2/week in the past 6 months | RLS 164/861 = 19.0% (16.6-21.8) | NR | NR | NR | NR | NR | 7/9 |

|                              |                 |                                                                                                                                                                                                                                                                                                                    |               |                        |                           |                       |    |                 |                   |    |    |     |
|------------------------------|-----------------|--------------------------------------------------------------------------------------------------------------------------------------------------------------------------------------------------------------------------------------------------------------------------------------------------------------------|---------------|------------------------|---------------------------|-----------------------|----|-----------------|-------------------|----|----|-----|
|                              |                 | pregnancy; previous or current treatment with clonazepam, dopamine agonists (except if used for a definite RLS diagnosis), or antidopaminergic; history of alcohol or drug abuse; MMSE <24; recent MS diagnosis within 6 months, relapse within 3 months, treatment with any dose of steroids during last 3 months |               |                        |                           |                       |    |                 |                   |    |    |     |
| Miri <sup>54</sup><br>(2013) | Iran/<br>Tehran | MS outpatient clinic, Sina                                                                                                                                                                                                                                                                                         | January 2010- | Neurologist diagnosed: | Interview IRLSSG criteria | RLS<br>57/205 = 27.8% | NR | 8/41 =<br>19.5% | 49/164 =<br>29.9% | NR | NR | 5/9 |



|                                     |        |                                                                                                                                                                                                                         |            |                                          |                                                                                                                       |                                                                                                        |    |                 |            |    |    |     |
|-------------------------------------|--------|-------------------------------------------------------------------------------------------------------------------------------------------------------------------------------------------------------------------------|------------|------------------------------------------|-----------------------------------------------------------------------------------------------------------------------|--------------------------------------------------------------------------------------------------------|----|-----------------|------------|----|----|-----|
|                                     |        | Hospital/<br>consecutive<br>patients<br>excluding those<br>with chronic<br>renal failure,<br>hypothyroidism<br>, diabetes,<br>pregnancy, MS<br>diagnosis<br>within last 6<br>months, relapse<br>within last 3<br>months | April 2010 | McDonald 2001                            |                                                                                                                       |                                                                                                        |    |                 |            |    |    |     |
| Moreira <sup>5</sup><br>5<br>(2008) | Brazil | MS outpatient<br>clinic/<br>consecutive<br>patients                                                                                                                                                                     | NR         | Neurologist<br>diagnosed:<br>Criteria NR | Questionnaire<br>IRLSSG criteria                                                                                      | RLS<br>12/44 = 27.3%                                                                                   | NR | 4/12 =<br>33.3% | 8/32 = 25% | NR | NR | 5/9 |
| Poirier <sup>56</sup><br>(1987)     | Canada | Neurology<br>clinic,<br>previously<br>typed for HLA-<br>A, B, C and DR                                                                                                                                                  | NR         | Neurologist<br>diagnosed:<br>Schumacher  | Questionnaire and<br>clinical interview<br>followed by MSLT<br>for suspicious<br>cases /Criteria for<br>narcolepsy NR | Daytime sleep<br>attacks<br>54/70 = 77%<br><br>Cataplectic<br>attacks<br>39/70 = 56%<br><br>Narcolepsy | NR | NR              | NR         | NR | NR | 2/9 |

|                                          |                  |                                                                                                                                                                                                                                                                                                                                                                                               |                                        |                                            |                              |                       |    |                  |                  |    |    |     |
|------------------------------------------|------------------|-----------------------------------------------------------------------------------------------------------------------------------------------------------------------------------------------------------------------------------------------------------------------------------------------------------------------------------------------------------------------------------------------|----------------------------------------|--------------------------------------------|------------------------------|-----------------------|----|------------------|------------------|----|----|-----|
|                                          |                  |                                                                                                                                                                                                                                                                                                                                                                                               |                                        |                                            |                              | 0/70 = 0%             |    |                  |                  |    |    |     |
| Shaygan<br>nejad <sup>57</sup><br>(2013) | Iran/<br>Isfahan | MS outpatient<br>clinic,<br>University<br>Hospital of<br>Kashani<br>excluding use<br>of<br>dopaminergic<br>and<br>antidopaminergi<br>c drugs, renal<br>failure,<br>pregnancy,<br>sideropenic<br>anemia, MS<br>diagnosis in the<br>last 6 months,<br>MS relapse<br>within the last 3<br>months, history<br>of alcohol or<br>drug abuse, or<br>use of high dose<br>steroids in last 6<br>months | September<br>2011-<br>December<br>2011 | Neurologist<br>diagnosed:<br>McDonald 2001 | Interview<br>IRLSSG criteria | RLS<br>82/126 = 65.1% | NR | 60/96 =<br>62.5% | 22/30 =<br>73.3% | NR | NR | 5/9 |

|                                   |                           |                                                                                                                                                                                                                                                   |                              |                                         |                                                                                  |                                                                               |    |    |    |    |    |     |
|-----------------------------------|---------------------------|---------------------------------------------------------------------------------------------------------------------------------------------------------------------------------------------------------------------------------------------------|------------------------------|-----------------------------------------|----------------------------------------------------------------------------------|-------------------------------------------------------------------------------|----|----|----|----|----|-----|
| Tachibana <sup>58</sup><br>(1994) | United Kingdom/<br>London | MS clinic/<br>consecutive patients                                                                                                                                                                                                                | NR                           | Neurologist diagnosed:<br>McDonald 1986 | Self-report sleep symptoms and polysomnography                                   | OSA<br>2/28 = 7.14%                                                           | NR | NR | NR | NR | NR | 3/8 |
| Vavrov <sup>59</sup><br>(2012)    | Czech Republic/<br>Prague | MS Centre,<br>Department of Neurology<br>Faculty of Medicine,<br>excluding dopaminergic<br>and anti-dopaminergic<br>drugs, renal failure,<br>pregnancy, sideropenic<br>anaemia, MS diagnosis in last<br>6 months, relapse within<br>last 3 months | April 2009-<br>December 2009 | Neurologist diagnosed:<br>McDonald 2001 | Semi-structured interview<br>IRLSSG criteria/All 4<br>criteria in their lifetime | RLS<br>245/765 = 32%<br>(28.7–35.4)<br><br>Before MS onset:<br>49/765 = 6.40% | NR | NR | NR | NR | NR | 6/9 |

NR: Not Reported, RLS: Restless Legs Syndrome, IRLSSG: International Restless Legs Syndrome Study Group, OSA: Obstructive Sleep Apnea, CSA: Central Sleep Apnea, AHI: apnea-hypopnea index, PSQI: Pittsburg Sleep Quality Index, RBD: Sleep Behavior Disorder, PLM: Periodic Limb Movement
