# Supplementary material for: A systematic review of the incidence and prevalence of sleep disorders and seizure disorders in multiple sclerosis
Source: PubMed Central journal article supplement — Mult Scler. 2015 Mar;21(3):342–9. doi: 10.1177/1352458514564486 (PMC4429167; doi:10.1177/1352458514564486), 2015-03
Supplement: Supplemental_Table_5.pdf [file Supplemental_Table_5.pdf]

**Supplemental Table 5. The prevalence of sleep disorders in the multiple sclerosis population as compared to controls**

| Study (year)                        | MS, n | Controls, n (matched) | Source of controls                                           | Sleep Disorders in MS                                                                                               | Sleep Disorders in controls                                                                                              | Comparison                                                                     |
|-------------------------------------|-------|-----------------------|--------------------------------------------------------------|---------------------------------------------------------------------------------------------------------------------|--------------------------------------------------------------------------------------------------------------------------|--------------------------------------------------------------------------------|
| <i>Prevalence</i>                   |       |                       |                                                              |                                                                                                                     |                                                                                                                          |                                                                                |
| Auger <sup>60</sup> (2005)          | 200   | 100 (no)              | 100 RA patients<br><br>100 non-MS, non-RA spouses or friends | RLS<br>75/200 = 37.5%                                                                                               | RA<br>31/100= 31.0%<br><br>Healthy controls<br>16/100= 16.0%                                                             | RA<br>p>0.05<br><br>Healthy controls:<br>p<0.0001                              |
| Deriu <sup>44</sup> (2009)          | 202   | 212 (yes: sex, age)   | 100 healthy controls                                         | RLS<br>29/202 = 14.4%                                                                                               | RLS<br>6/212 = 2.83%                                                                                                     | p = 0.00002                                                                    |
| Ferini-Strambi <sup>46</sup> (1994) | 25    | 25 (yes: sex, age)    | Healthy controls                                             | PLM<br>9/25 = 36%                                                                                                   | PLM<br>2/25 = 8%                                                                                                         | P = 0.02                                                                       |
| Fragoso <sup>47</sup> (2011)        | 80    | 180 (no)              | Healthy controls from the General Population                 | RLS<br>46/80 = 57.5%<br><br>Mild RLS<br>7/80 = 8.75%<br><br>Moderate<br>23/80 = 28.8%<br><br>Severe<br>9/80 = 11.3% | RLS<br>33/180 = 18.3%<br><br>Mild RLS<br>15/180 = 8.75%<br><br>Moderate<br>15/180 = 28.8%<br><br>Severe<br>2/180 = 11.3% | OR<br>RLS<br>6.02 (3.36-10.78)<br><br>Moderate-Severe RLS<br>5.39 (2.76-10.48) |
| Gomez-Choco <sup>48</sup> (2007)    | 135   | 118 (yes: sex, age)   | Unrelated healthy controls from General Population           | RLS<br>18/135 = 13.3%                                                                                               | RLS<br>11/118 = 9.32%                                                                                                    | RLS<br>p>0.05                                                                  |

|                                  |     |                    |                                                                                                                                                                                                                       |                                                                                                                       |                                                                                                                  |                                                                                                                                                                                                                                                                       |
|----------------------------------|-----|--------------------|-----------------------------------------------------------------------------------------------------------------------------------------------------------------------------------------------------------------------|-----------------------------------------------------------------------------------------------------------------------|------------------------------------------------------------------------------------------------------------------|-----------------------------------------------------------------------------------------------------------------------------------------------------------------------------------------------------------------------------------------------------------------------|
|                                  |     |                    |                                                                                                                                                                                                                       | RBD<br>3/135 = 2.22%                                                                                                  | RBD<br>0/118 = 0%                                                                                                |                                                                                                                                                                                                                                                                       |
| Kaminska <sup>49</sup><br>(2012) | 62  | 32 (yes: sex, age) | Individuals without neurological disorders recruited from dermatology and preoperative clinics (patients and companions), local volunteers (friends of research team members), and from posted library advertisements | OSA (AHI ≥15)<br>36/62 = 58.1%<br><br>RLS<br>17/62 = 27.4%<br><br>RBD<br>2/62 = 3.2%<br><br>Narcolepsy<br>1/62 = 1.6% | OSA (AHI ≥15)<br>15/32 = 46.9%<br><br>RLS<br>2/32 = 6.25%<br><br>RBD<br>0/32 = 0%<br><br>Narcolepsy<br>0/32 = 0% | OR<br>OSA<br>1.57 (0.67–3.74)<br><br>RLS<br>5.80 (1.51–38.2)                                                                                                                                                                                                          |
| Li <sup>50</sup><br>(2012)       | 264 | 65,280 (no)        | Nurses' Health Study (NHS) II/ Women without a diagnosis of MS                                                                                                                                                        | RLS<br>41/264 = 15.5%<br><br>Severe RLS<br>26/264 = 9.85%                                                             | RLS<br>4,182/65,280 = 6.40%<br><br>Severe RLS<br>1,722/65,280 = 2.64%                                            | OR<br>Age adjusted<br>2.68 (1.92-3.74)<br>Multivariate adjusted<br>2.77 (1.92-3.98)<br>Further adjusted for<br>other sleep disorders<br>2.72 (1.89-3.93)<br><br>Age adjusted<br>4.01 (2.67-6.03)<br>Multivariate adjusted<br>4.21 (2.71-6.53)<br>Further adjusted for |

|                                      |     |                     |                                    |                                        |                               |                                                           |
|--------------------------------------|-----|---------------------|------------------------------------|----------------------------------------|-------------------------------|-----------------------------------------------------------|
|                                      |     |                     |                                    |                                        |                               | other sleep disorders<br>4.12 (2.65-6.42)                 |
| Manconi <sup>52</sup><br>(2008)      | 861 | 649 (yes: age, sex) | Spouses or friends of the probands | RLS<br>164/861 = 19.0% (16.6-<br>21.8) | RLS<br>27/649 = 4.16% (2.9-6) | OR<br>5.4 (3.56-8.26)<br>X <sup>2</sup> 74.23 (p<0.00001) |
| Shaygannejad <sup>57</sup><br>(2013) | 126 | 126 (yes: age, sex) | Healthy controls                   | RLS<br>82/126 = 65.1%                  | RLS<br>16/126 = 12.7%         | p<0.001                                                   |

NR: Not Reported, RA: Rheumatoid Arthritis, RLS: Restless Legs Syndrome, RBD: Sleep Behavior Disorder, OR: Odds Ratio, PLM: Periodic Limb Movement
